# Supplementary material for: Nd3+,Ho3+-Codoped apatite-related NaLa9(GeO4)6O2 phosphors for the near- and middle-infrared region
Source: Royal Society of Chemistry journal article supplement (doi:10.1039/c8dt02716a), 2018-01-01
Supplement: c8dt02716a1.pdf [file c8dt02716a1.pdf]

## Nd<sup>3+</sup>, Ho<sup>3+</sup>-codoped apatite-related NaLa<sub>9</sub>(GeO<sub>4</sub>)<sub>6</sub>O<sub>2</sub> phosphors for the near- and middle-infrared region

Yana V. Baklanova,<sup>a</sup> Olga A. Lipina,<sup>a</sup> Andrey N. Enyashin,<sup>a</sup> Ludmila L. Surat,<sup>a</sup>  
Alexander P. Tyutyunnik,<sup>a</sup> Nadezda V. Tarakina,<sup>b,c</sup> A. Dominic Fortes,<sup>d</sup> Alexander Yu. Chufarov,<sup>a</sup>  
Evgeny V. Gorbatov<sup>a</sup> and Vladimir G. Zubkov<sup>a</sup>

<sup>a</sup> Institute of Solid State Chemistry, UB RAS, 620990 Ekaterinburg, Russia.

<sup>b</sup> Max Planck Institute of Colloids and Interfaces, Am Mühlenberg 1, 14476 Potsdam, Germany.

<sup>c</sup> School of Engineering and Materials Science, Queen Mary University of London, Mile End Road, London E1 4NS, United Kingdom.

<sup>d</sup> ISIS Facility, Rutherford Appleton Laboratory, Harwell Science & Innovation Campus, Chilton, Oxfordshire OX11 0QX, United Kingdom.

### Supplementary Information

**Table S1.** Crystal data for NaLa<sub>9-x-y</sub>Nd<sub>x</sub>Ho<sub>y</sub>(GeO<sub>4</sub>)<sub>6</sub>O<sub>2</sub> powders

| <i>x</i> | <i>y</i>             | <i>a</i> , Å | <i>c</i> , Å | <i>V</i> , Å <sup>3</sup> |
|----------|----------------------|--------------|--------------|---------------------------|
| 0.025    | 2×10 <sup>-7</sup>   | 9.8887(4)    | 7.2621(4)    | 614.99(3)                 |
| 0.050    | 3×10 <sup>-7</sup>   | 9.8892(4)    | 7.2613(4)    | 614.99(3)                 |
| 0.075    | 4×10 <sup>-7</sup>   | 9.8882(4)    | 7.2615(4)    | 614.89(3)                 |
| 0.100    | 5×10 <sup>-7</sup>   | 9.8884(4)    | 7.2606(4)    | 614.83(3)                 |
| 0.125    | 6×10 <sup>-7</sup>   | 9.8875(4)    | 7.2611(4)    | 614.77(3)                 |
| 0.125    | 1.4×10 <sup>-6</sup> | 9.8875(4)    | 7.2594(4)    | 614.62(3)                 |
| 0.150    | 7×10 <sup>-7</sup>   | 9.8877(4)    | 7.2597(4)    | 614.67(3)                 |
| 0.200    | 8×10 <sup>-7</sup>   | 9.8871(4)    | 7.2592(4)    | 614.54(3)                 |
| 0.125    | 0.01                 | 9.8855(4)    | 7.2625(4)    | 614.63(3)                 |
| 0.125    | 0.10                 | 9.8859(4)    | 7.2553(4)    | 614.07(3)                 |

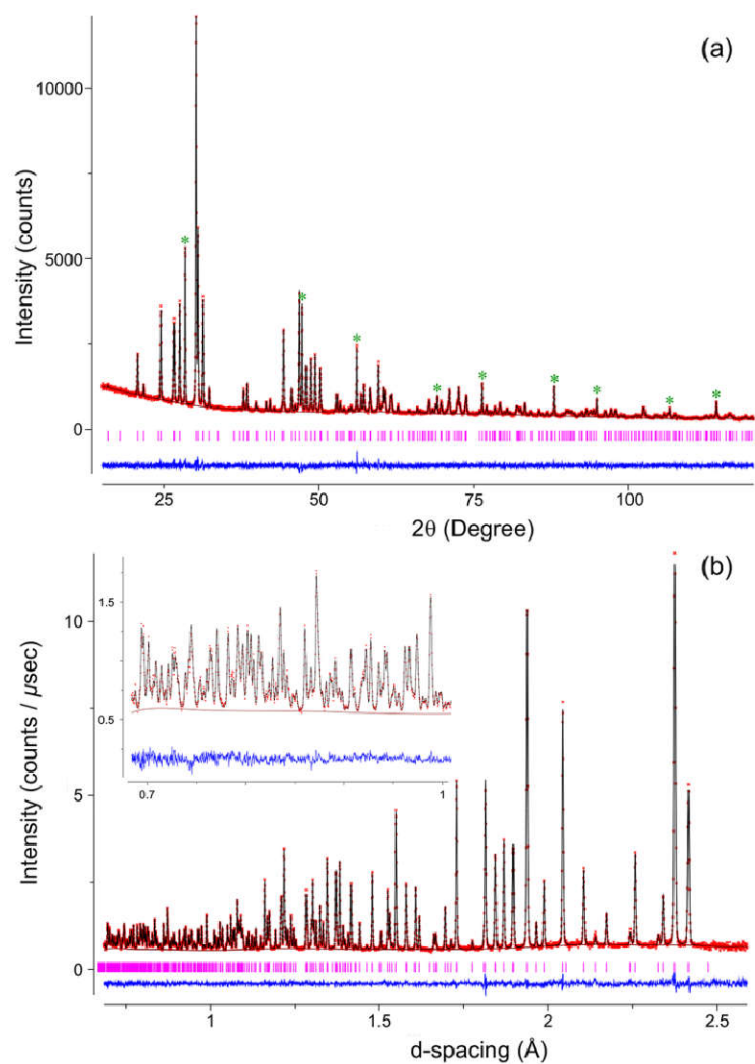

**Fig. S1.** Experimental, calculated, and difference patterns of  $\text{NaLa}_{8.875-y}\text{Nd}_{0.125}\text{Ho}_y(\text{GeO}_4)_6\text{O}_2$  ( $y = 1.4 \times 10^{-6}$ ): (a) XRD, (b) TOF NPD. The symbol “\*” denotes the peaks of the internal silicon standard.

**Table S2.** Structural data for  $\text{NaLa}_{8.875-y}\text{Nd}_{0.125}\text{Ho}_y(\text{GeO}_4)_6\text{O}_2$  ( $y = 1.4 \times 10^{-6}$ ) based on neutron data

|                                  |               |
|----------------------------------|---------------|
| Space group, #                   | $P6_3/m, 176$ |
| The number of formula units, $Z$ | 1             |
| Cell constants:                  |               |
| $a = b, \text{Å}$                | 9.88903(6)    |
| $c, \text{Å}$                    | 7.25602(5)    |
| $V, \text{Å}^3$                  | 614.521(7)    |
| $D_x, \text{g/cm}^3$             | 5.757         |
| $wR_p, \%$                       | 2.25          |
| $R_p, \%$                        | 2.98          |
| $R(F^2), \%$                     | 3.99          |
| $\chi^2$                         | 1.930         |

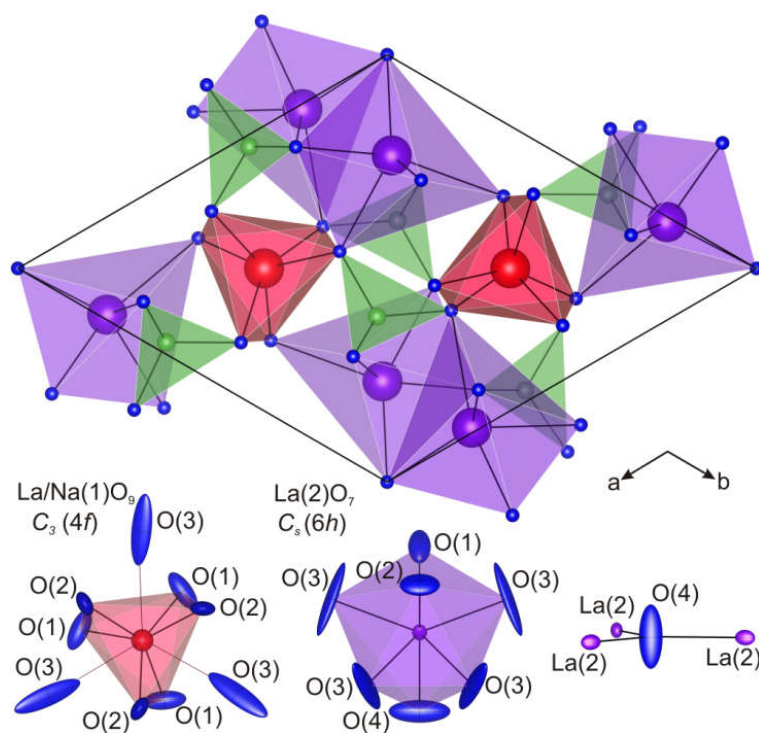

**Fig. S2.** Projections of the crystal structure of  $\text{NaLa}_{8.875-y}\text{Nd}_{0.125}\text{Ho}_y(\text{GeO}_4)_6\text{O}_2$  ( $y = 1.4 \times 10^{-6}$ ) onto the (001) planes:  $\text{GeO}_4$  tetrahedra (green),  $\text{La/Na(1)O}_9$  twisted trigonal prisms (red),  $\text{La(2)O}_7$  polyhedra (purple) and oxygen atoms (blue balls), and the coordination environment of cation positions.

**Table 3.** Atomic coordinates and anisotropic thermal parameters ( $U \times 100, \text{\AA}^2$ ) of  $\text{NaLa}_{8.875-\gamma}\text{Nd}_{0.125}\text{Ho}_{\gamma}(\text{GeO}_4)_6\text{O}_2$  ( $\gamma = 1.4 \times 10^{-6}$ ) based on neutron data

| Atom                | $x/a$ | $y/b$         | $z/c$         | Fraction       | $U_{11} \times 100$   | $U_{22} \times 100$ | $U_{33} \times 100$ | $U_{12} \times 100$ | $U_{13} \times 100$ | $U_{23} \times 100$ |           |
|---------------------|-------|---------------|---------------|----------------|-----------------------|---------------------|---------------------|---------------------|---------------------|---------------------|-----------|
| La/<br>Na/<br>Nd(1) | $4f$  | $1/3$         | $2/3$         | $-0.00052(13)$ | $0.25/$<br>$0.0104$   | $0.73(3)$           | $0.73(3)$           | $1.29(5)$           | $0.36(2)$           | $0$                 | $0$       |
| La/<br>Nd(2)        | $6h$  | $0.24175(6)$  | $0.01243(8)$  | $1/4$          | $0.9861/$<br>$0.0139$ | $0.39(4)$           | $0.23(3)$           | $0.31(3)$           | $0.01(3)$           | $0$                 | $0$       |
| Ge                  | $6h$  | $0.37354(7)$  | $0.40133(7)$  | $1/4$          | $1.0$                 | $0.33(3)$           | $0.53(3)$           | $0.42(3)$           | $0.32(3)$           | $0$                 | $0$       |
| O(1)                | $6h$  | $0.48858(10)$ | $0.31495(10)$ | $1/4$          | $1.0$                 | $1.50(6)$           | $2.83(6)$           | $0.72(5)$           | $1.76(5)$           | $0$                 | $0$       |
| O(2)                | $6h$  | $0.52442(10)$ | $0.39596(10)$ | $3/4$          | $1.0$                 | $0.34(5)$           | $0.66(5)$           | $2.31(6)$           | $0.05(4)$           | $0$                 | $0$       |
| O(3)                | $12i$ | $0.24763(8)$  | $0.33958(9)$  | $0.43834(7)$   | $1.0$                 | $1.52(4)$           | $7.61(6)$           | $1.18(3)$           | $2.83(4)$           | $1.10(3)$           | $2.68(4)$ |
| O(4)                | $2a$  | $0.0$         | $0.0$         | $1/4$          | $1.0$                 | $0.72(5)$           | $0.72(5)$           | $5.41(13)$          | $0.36(2)$           | $0$                 | $0$       |

Anisotropic thermal factors are defined by  $T = e [-2\pi^2(u_{11}h^2a^{*2} + \dots + 2u_{12}hka^*b^* + \dots)]$

**Table S4.** Selected interatomic distances  $d$  (Å) and angles ( $^\circ$ ) for  $\text{NaLa}_{8.875-y}\text{Nd}_{0.125}\text{Ho}_y(\text{GeO}_4)_6\text{O}_2$  ( $y = 1.4 \times 10^{-6}$ ) based on neutron data

| Interatomic distances     |               | Interatomic distances     |               |
|---------------------------|---------------|---------------------------|---------------|
| M(1)-O(1) $\times 3$      | 2.4681(9)     | M(2)-O(1)                 | 2.7578(11)    |
| M(1)-O(2) $\times 3$      | 2.5569(10)    | M(2)-O(2)                 | 2.5282(10)    |
| M(1)-O(3) $\times 3$      | 2.9399(7)     | M(2)-O(3) $\times 2$      | 2.6203(9)     |
| <b>M(1)-O<sup>b</sup></b> | <b>2.6549</b> | M(2)-O(3) $\times 2$      | 2.4306(6)     |
| Expected <sup>a</sup>     | 2.597         | M(2)-O(4)                 | 2.3317(5)     |
|                           |               | <b>M(2)-O<sup>b</sup></b> | <b>2.5314</b> |
| Ge-O(1)                   | 1.7308(9)     | Expected <sup>a</sup>     | 2.470         |
| Ge-O(2)                   | 1.7360(9)     |                           |               |
| Ge-O(3) $\times 2$        | 1.7408(7)     |                           |               |
| <b>Ge-O</b>               | <b>1.7371</b> |                           |               |
| Expected <sup>a</sup>     | 1.770         |                           |               |
| Angles                    |               | Angles                    |               |
| O(1)-M(1)-O(1) $\times 3$ | 72.13(3)      | O(1)-M(2)-O(2)            | 98.47(3)      |
| O(1)-M(1)-O(2) $\times 3$ | 94.62(2)      | O(1)-M(2)-O(3) $\times 2$ | 145.49(2)     |
| O(1)-M(1)-O(2) $\times 3$ | 154.41(3)     | O(1)-M(2)-O(3) $\times 2$ | 69.87(2)      |
| O(1)-M(1)-O(2) $\times 3$ | 125.58(2)     | O(1)-M(2)-O(4)            | 112.66(3)     |
| O(2)-M(1)-O(2) $\times 3$ | 75.04(3)      | O(2)-M(2)-O(3) $\times 2$ | 85.76(2)      |
|                           |               | O(2)-M(2)-O(3) $\times 2$ | 70.12(3)      |
| O(1)-Ge-O(2)              | 115.08(6)     | O(2)-M(2)-O(4)            | 148.88(4)     |
| O(1)-Ge-O(3) $\times 2$   | 110.99(3)     | O(3)-M(2)-O(3)            | 62.87(3)      |
| O(2)-Ge-O(3) $\times 2$   | 107.81(4)     | O(3)-M(2)-O(3)            | 137.00(4)     |
| O(3)-Ge-O(3)              | 103.45(5)     | O(3)-M(2)-O(3) $\times 2$ | 76.74(1)      |
|                           |               | O(3)-M(2)-O(3) $\times 2$ | 137.82(3)     |
|                           |               | O(4)-M(2)-O(3) $\times 2$ | 83.49(2)      |
|                           |               | O(4)-M(2)-O(3) $\times 2$ | 104.41(2)     |

<sup>a</sup> The sum of the crystal radii according to<sup>47</sup>:  $\text{Na}^+$  IX – 1.380 Å;  $\text{La}^{+3}$  VII – 1.24 Å,  $\text{La}^{+3}$  IX – 1.356 Å;  $\text{Nd}^{+3}$  VII – 1.186 Å was calculated as mean of  $\text{Nd}^{+3}$  VI – 1.123,  $\text{Nd}^{+3}$  VIII – 1.249, and  $\text{Nd}^{+3}$  IX – 1.303 Å;  $\text{Ge}^{+4}$  IV – 0.530 Å;  $\text{O}^{-2}$  III – 1.22 Å,  $\text{O}^{-2}$  IV – 1.24 Å. Effective crystal radius was calculated taking in account fractions.

<sup>b</sup> The average values are indicated by boldface type. M(1) = La/Na/Nd(1), M(2) = La/Nd(2).

**Table S5.** Bond–valence sums (BVSs) for the cations and oxygen anions for  $\text{NaLa}_{8.875-y}\text{Nd}_{0.125}\text{Ho}_y(\text{GeO}_4)_6\text{O}_2$  ( $y = 1.4 \times 10^{-6}$ )

| Atom  | Assumed oxidation state | BVS   | % deviation |
|-------|-------------------------|-------|-------------|
| La(1) | +3                      | 2.793 | 7           |
| Na(1) | +1                      | 1.011 | 1           |
| La(2) | +3                      | 2.834 | 6           |
| Ge    | +4                      | 4.130 | 3           |
| O(1)  | -2                      | 1.971 | 1           |
| O(2)  | -2                      | 2.014 | 1           |
| O(3)  | -2                      | 1.928 | 4           |
| O(4)  | -2                      | 1.953 | 2           |

BVSs were calculated taking into account La/Na fractions, fractions of Nd were added to fraction of La.

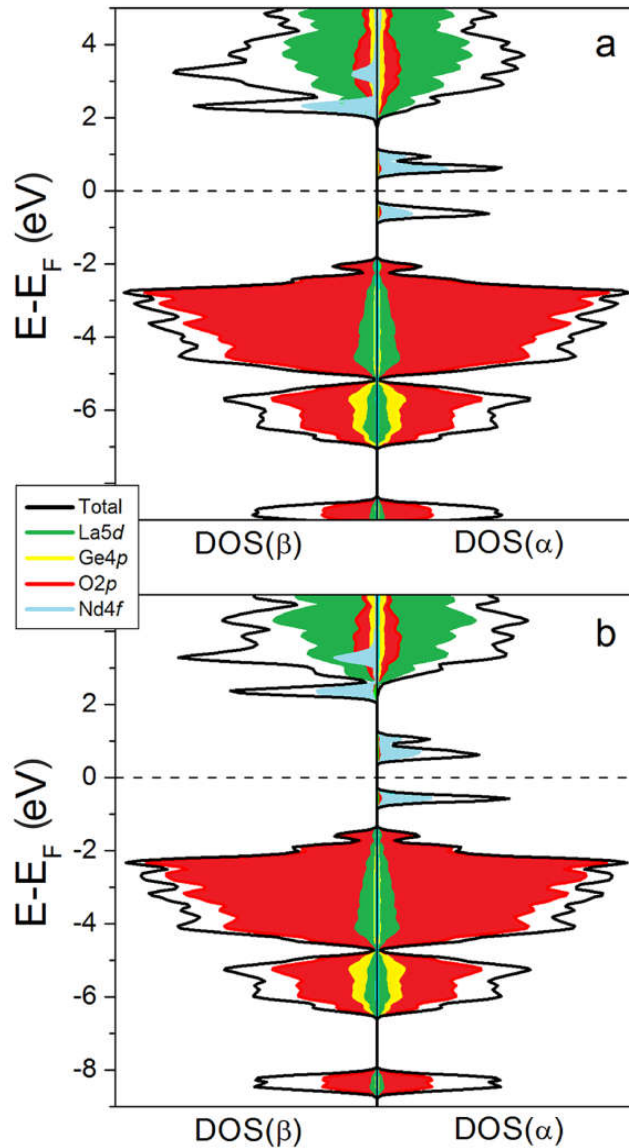

**Fig. S3.** Spin-resolved total and partial densities of states (DOS) for the  $\text{NaLa}_9(\text{GeO}_4)_6\text{O}_2$  compound doped by single-atom Nd impurities on  $6h$  (a) or  $4f$  sites (b). DFT GGA calculations.

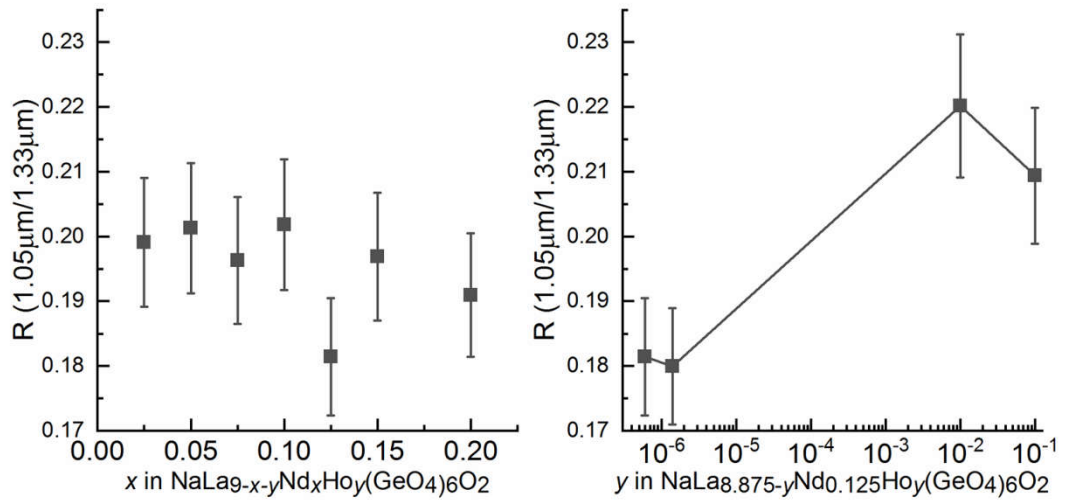

**Fig. S4.** The ratios of the integrated intensities of lines centered at 1.05  $\mu\text{m}$  and 1.33  $\mu\text{m}$  depend on the  $\text{Nd}^{3+}$  and  $\text{Ho}^{3+}$  concentration in the  $\text{NaLa}_{9-x-y}\text{Nd}_x\text{Ho}_y(\text{GeO}_4)_6\text{O}_2$  ( $x = 0.025\text{--}0.200$ ,  $y = 2 \times 10^{-7}\text{--}0.1$ ).

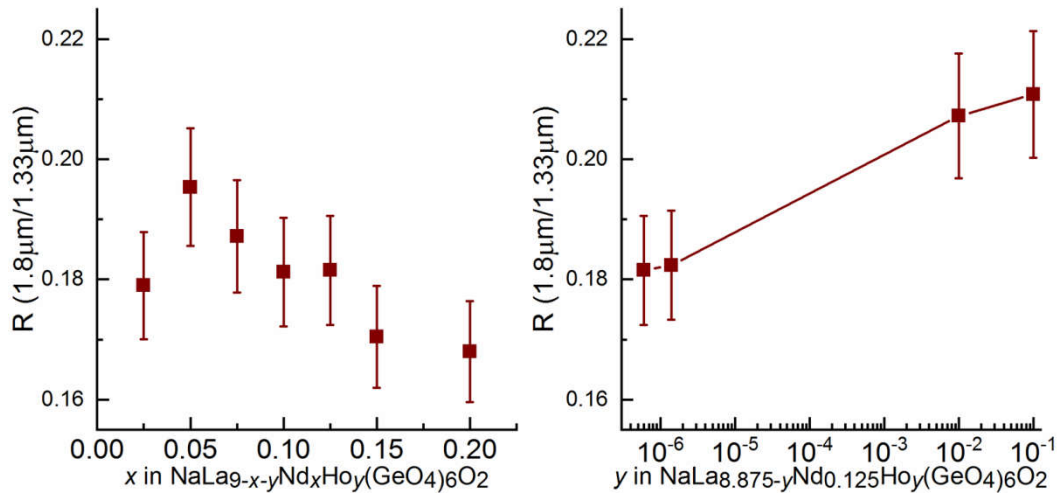

**Fig. S5.** The ratios of the integrated intensities of lines centered at 1.33  $\mu\text{m}$  and 1.80  $\mu\text{m}$  depend on the  $\text{Nd}^{3+}$  and  $\text{Ho}^{3+}$  concentration in the  $\text{NaLa}_{9-x-y}\text{Nd}_x\text{Ho}_y(\text{GeO}_4)_6\text{O}_2$  ( $x = 0.025\text{--}0.200$ ,  $y = 2 \times 10^{-7}\text{--}0.1$ ).

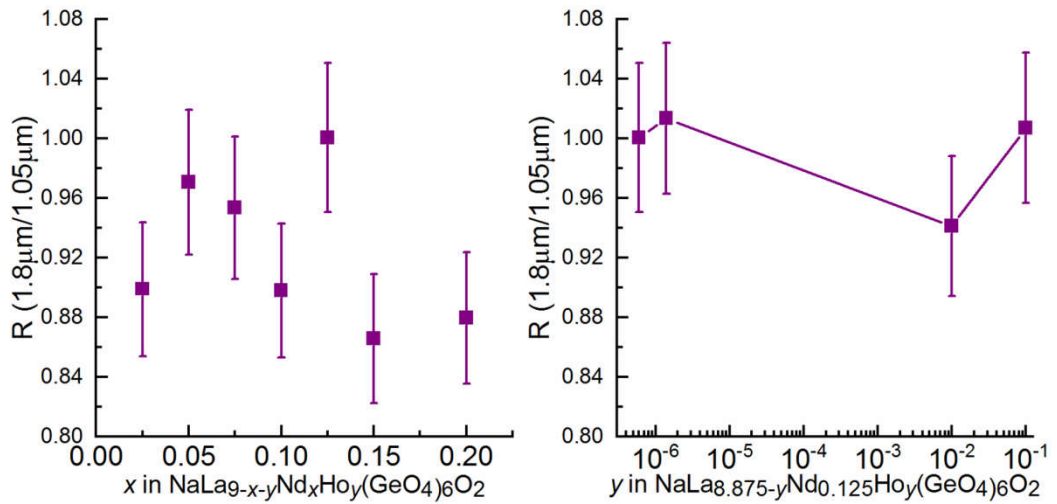

**Fig. S6.** The ratios of the integrated intensities of lines centered at 1.05  $\mu\text{m}$  and 1.80  $\mu\text{m}$  depend on the  $\text{Nd}^{3+}$  and  $\text{Ho}^{3+}$  concentration in the  $\text{NaLa}_{9-x-y}\text{Nd}_x\text{Ho}_y(\text{GeO}_4)_6\text{O}_2$  ( $x = 0.025\text{--}0.200$ ,  $y = 2 \times 10^{-7}\text{--}0.1$ ).

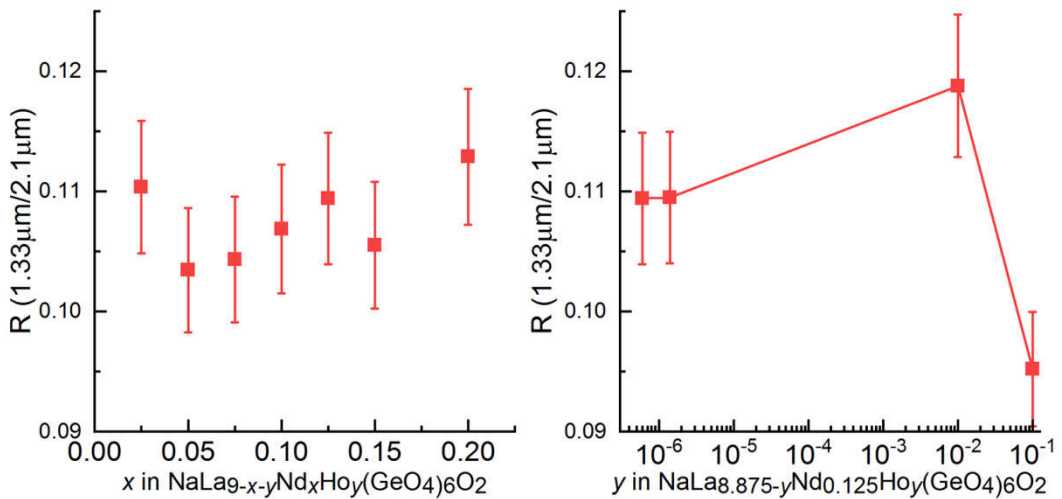

**Fig. S7.** The ratios of the integrated intensities of lines centered at 1.33  $\mu\text{m}$  and 2.10  $\mu\text{m}$  depend on the  $\text{Nd}^{3+}$  and  $\text{Ho}^{3+}$  concentration in the  $\text{NaLa}_{9-x-y}\text{Nd}_x\text{Ho}_y(\text{GeO}_4)_6\text{O}_2$  ( $x = 0.025\text{--}0.200$ ,  $y = 2 \times 10^{-7}\text{--}0.1$ ).



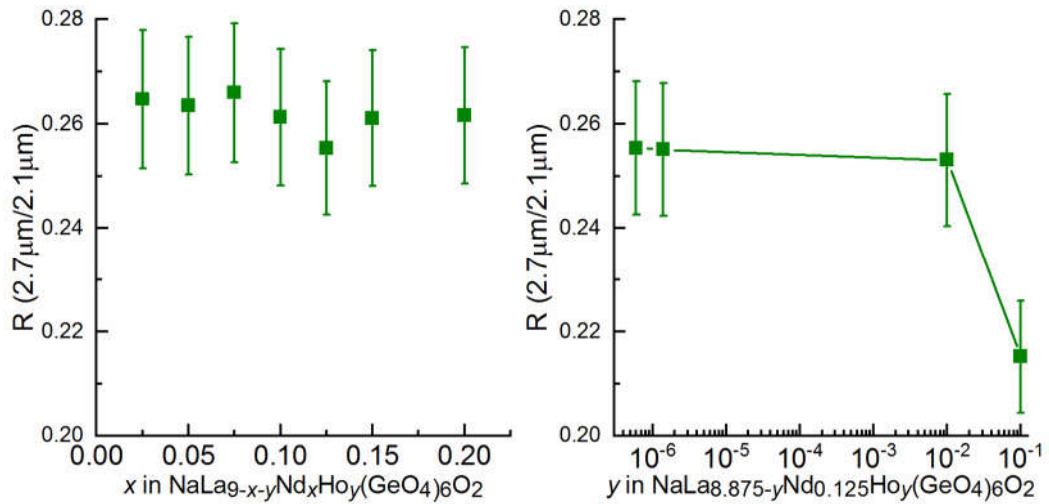

**Fig. S8.** The ratios of the integrated intensities of lines centered at 2.1 μm and 2.7 μm depend on the Nd<sup>3+</sup> and Ho<sup>3+</sup> concentration in the NaLa<sub>9-x-y</sub>Nd<sub>x</sub>Ho<sub>y</sub>(GeO<sub>4</sub>)<sub>6</sub>O<sub>2</sub> ( $x = 0.025-0.200$ ,  $y = 2 \times 10^{-7}-0.1$ ).

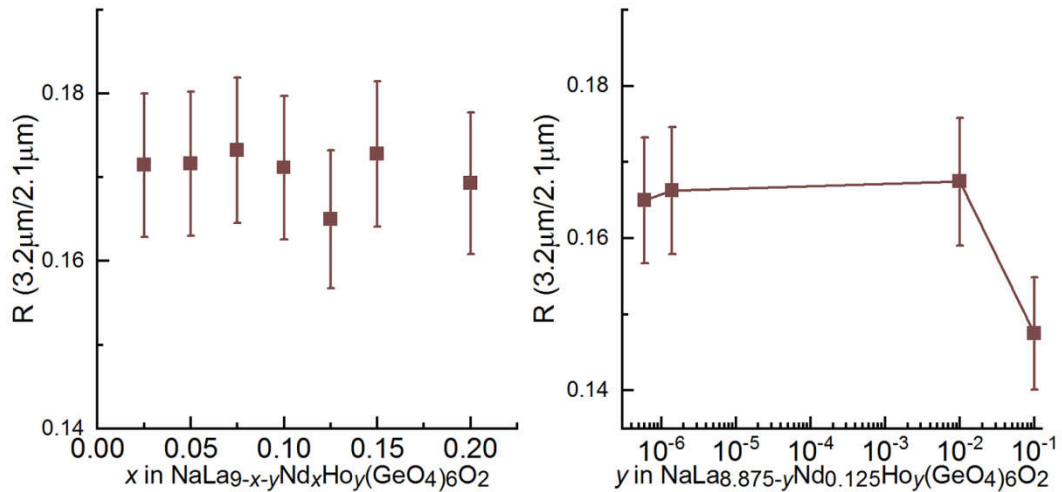

**Fig. S9.** The ratios of the integrated intensities of lines centered at 2.1 μm and 3.2 μm depend on the Nd<sup>3+</sup> and Ho<sup>3+</sup> concentration in the NaLa<sub>9-x-y</sub>Nd<sub>x</sub>Ho<sub>y</sub>(GeO<sub>4</sub>)<sub>6</sub>O<sub>2</sub> ( $x = 0.025-0.200$ ,  $y = 2 \times 10^{-7}-0.1$ ).

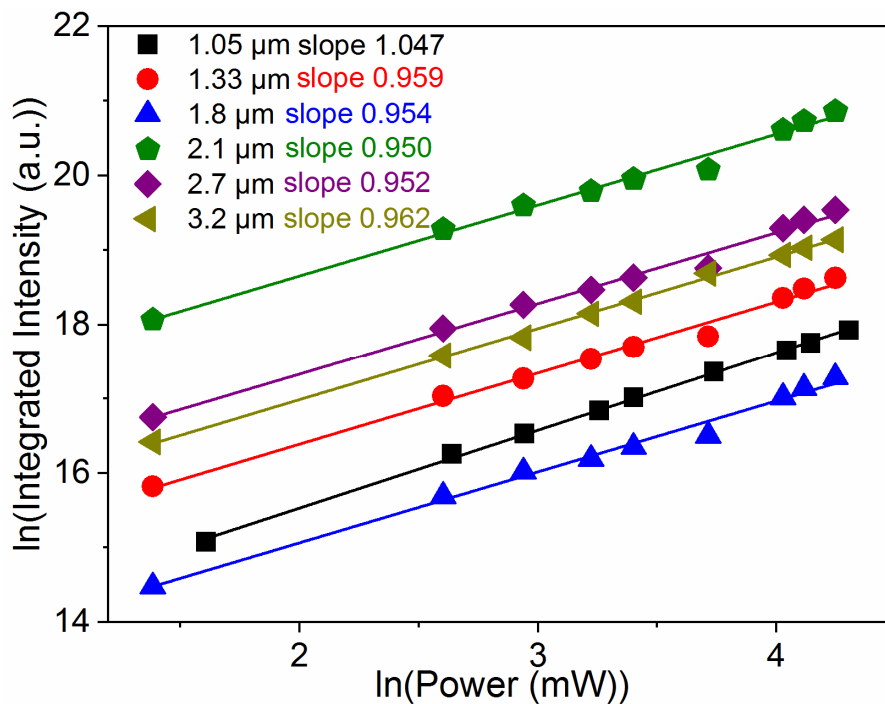

**Fig. S10.** The power dependences of the luminescence intensity of the lines at 1.05  $\mu\text{m}$ , 1.33  $\mu\text{m}$ , 1.80  $\mu\text{m}$ , 2.10  $\mu\text{m}$ , 2.70  $\mu\text{m}$  and 3.20  $\mu\text{m}$  for the  $\text{NaLa}_{8.875-y}\text{Nd}_{0.125}\text{Ho}_y(\text{GeO}_4)_6\text{O}_2$  ( $y = 1.4 \times 10^{-6}$ ) sample at the low-power regime. The laser excitation wavelength is 808 nm.

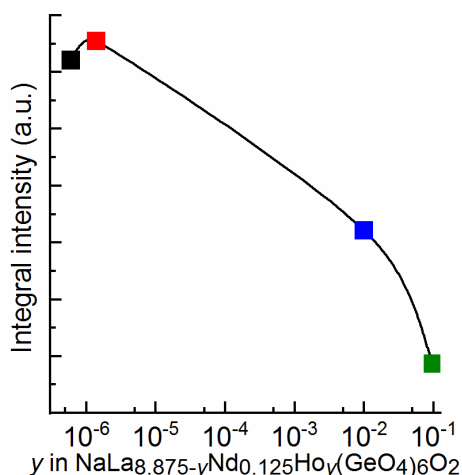

**Fig. S11.** The integral luminescence intensity of the 3.2  $\mu\text{m}$  lines versus  $\text{Ho}^{3+}$  concentration in  $\text{NaLa}_{8.875-y}\text{Nd}_{0.125}\text{Ho}_y(\text{GeO}_4)_6\text{O}_2$  ( $y = 6 \times 10^{-7} - 0.1$ ).
